# Supplementary material for: Molecular characterization of ferroptosis in soft tissue sarcoma constructs a prognostic and immunotherapeutic signature through experimental and bioinformatics analyses
Source: publisher site journal article supplement (doi:10.18632/aging.205133), 2023-10-20
Supplement: Supplementary file [file aging-v15i20-205133-supplementary-material-SD2.pdf]

## SUPPLEMENTARY TABLES

**Supplementary Table 1. Basic information of datasets included in this study.**

| Accession number/<br>Source | Platform                                       | Number of<br>patients | Number of<br>samples used in<br>this study | Research<br>object | Survival<br>data |
|-----------------------------|------------------------------------------------|-----------------------|--------------------------------------------|--------------------|------------------|
| GSE21122                    | Affymetrix Human Genome U133<br>Plus 2.0 Array | 62                    | 158                                        | Human              | OS               |
| GSE35640                    | Affymetrix Human Genome U133<br>Plus 2.0 Array | 65                    | 56                                         | Human              | OS               |
| GSE78220                    | Illumina RNAseq                                | 28                    | 28                                         | Human              | OS               |
| IMvigor210                  | Illumina RNAseq                                | 348                   | 282                                        | Human              | OS               |
| GSE119041                   | Affymetrix Human Genome U133<br>Plus 2.0 Array | 50                    | 50                                         | Human              | OS               |
| GSE40021                    | Agilent-014850                                 | 58                    | 58                                         | Human              | NA               |
| GSE159848                   | Agilent-014850                                 | 50                    | 50                                         | Human              | OS               |
| GSE159847                   | Agilent-014850                                 | 87                    | 87                                         | Human              | OS               |
| GSE17618                    | Affymetrix Human Genome U133<br>Plus 2.0 Array | 55                    | 44                                         | Human              | OS               |
| GSE71118                    | Affymetrix Human Genome U133<br>Plus 2.0 Array | 312                   | 58                                         | Human              | OS               |
| TCGA: SARC                  | Illumina RNAseq                                | 265                   | 262                                        | Human              | OS               |
| TCGA: LAML                  | Illumina RNAseq                                | 151                   | 132                                        | Human              | OS               |
| TCGA: ACC                   | Illumina RNAseq                                | 79                    | 79                                         | Human              | OS               |
| TCGA: CHOL                  | Illumina RNAseq                                | 45                    | 45                                         | Human              | OS               |
| TCGA: BLCA                  | Illumina RNAseq                                | 430                   | 425                                        | Human              | OS               |
| TCGA: BRCA                  | Illumina RNAseq                                | 1217                  | 1214                                       | Human              | OS               |
| TCGA: CESC                  | Illumina RNAseq                                | 309                   | 296                                        | Human              | OS               |
| TCGA: COAD                  | Illumina RNAseq                                | 512                   | 487                                        | Human              | OS               |
| TCGA: UCEC                  | Illumina RNAseq                                | 583                   | 567                                        | Human              | OS               |
| TCGA: ESCA                  | Illumina RNAseq                                | 173                   | 172                                        | Human              | OS               |
| TCGA: GBM                   | Illumina RNAseq                                | 173                   | 167                                        | Human              | OS               |
| TCGA: UCS                   | Illumina RNAseq                                | 56                    | 54                                         | Human              | OS               |
| TCGA: HNSC                  | Illumina RNAseq                                | 546                   | 545                                        | Human              | OS               |
| TCGA: KICH                  | Illumina RNAseq                                | 89                    | 87                                         | Human              | OS               |
| TCGA: KIRC                  | Illumina RNAseq                                | 607                   | 602                                        | Human              | OS               |
| TCGA: KIRP                  | Illumina RNAseq                                | 321                   | 318                                        | Human              | OS               |
| TCGA: DLBC                  | Illumina RNAseq                                | 48                    | 47                                         | Human              | OS               |
| TCGA: LIHC                  | Illumina RNAseq                                | 424                   | 418                                        | Human              | OS               |
| TCGA: LGG                   | Illumina RNAseq                                | 529                   | 523                                        | Human              | OS               |
| TCGA: LUAD                  | Illumina RNAseq                                | 585                   | 572                                        | Human              | OS               |
| TCGA: LUSC                  | Illumina RNAseq                                | 550                   | 542                                        | Human              | OS               |
| TCGA: SKCM                  | Illumina RNAseq                                | 472                   | 458                                        | Human              | OS               |
| TCGA: MESO                  | Illumina RNAseq                                | 86                    | 84                                         | Human              | OS               |
| TCGA: UVM                   | Illumina RNAseq                                | 80                    | 80                                         | Human              | OS               |
| TCGA: OV                    | Illumina RNAseq                                | 379                   | 378                                        | Human              | OS               |
| TCGA: PAAD                  | Illumina RNAseq                                | 182                   | 181                                        | Human              | OS               |
| TCGA: PCPG                  | Illumina RNAseq                                | 186                   | 186                                        | Human              | OS               |
| TCGA: PRAD                  | Illumina RNAseq                                | 551                   | 551                                        | Human              | OS               |
| TCGA: READ                  | Illumina RNAseq                                | 177                   | 167                                        | Human              | OS               |
| TCGA: STAD                  | Illumina RNAseq                                | 407                   | 381                                        | Human              | OS               |
| TCGA: TGCT                  | Illumina RNAseq                                | 156                   | 139                                        | Human              | OS               |
| TCGA: THYM                  | Illumina RNAseq                                | 121                   | 118                                        | Human              | OS               |
| TCGA: THCA                  | Illumina RNAseq                                | 568                   | 567                                        | Human              | OS               |

Abbreviation: NA: Not applicable.

**Supplementary Table 2. The list of ferroptosis regulators.**

---

ACSL4  
AKR1C1  
AKR1C2  
AKR1C3  
ALOX15  
ALOX5  
ALOX12  
ATP5MC3  
CARS  
CBS  
CD44  
CHAC1  
CISD1  
CS  
DPP4  
FANCD2  
GCLC  
GCLM  
GLS2  
GPX4  
GSS  
HMGCR  
HSPB1  
CRYAB  
LPCAT3  
MT1G  
NCOA4  
PTGS2  
RPL8  
SAT1  
SLC7A11  
FDFT1  
TFRC  
TP53  
EMC2  
AIFM2  
PHKG2  
HSBP1  
ACO1  
FTH1  
STEAP3  
NFS1  
ACSL3  
ACACA  
PEBP1  
ZEB1  
SQLE

FADS2  
 NFE2L2  
 KEAP1  
 NQO1  
 NOX1  
 ABCC1  
 SLC1A5  
 GOT1  
 G6PD  
 PGD  
 IREB2  
 HMOX1  
 ACSF2

**Supplementary Table 3. The sequences of siRNA for LOX (5' to 3').**

|          |                     |
|----------|---------------------|
| siLOX-1: | GCAGGACTAGATGGAGCAA |
| siLOX-2: | TGGGACGAGTCAATCAACT |
| siLOX-3: | GATGGTGGATTACAATGGA |

**Supplementary Table 4. The prime sequences of all genes.**

| Genes    | Prime sequences (5'–3') |
|----------|-------------------------|
| ACACA-F  | AGGTGCCTAGAGGGTTGAAGA   |
| ACACA-R  | TCGGCCCTGCTTTACTAGGT    |
| ACSF2-F  | GCAGGCAGAGGATTCAGTTC    |
| ACSF2-R  | TTCATGGAGGACGACCAAGG    |
| AIFM2-F  | TGATTCTCTGCACCGGCATC    |
| AIFM2-R  | GCTGGCTAGTCTGCTCTCAA    |
| CBS-F    | GACCAAGTTCCTGAGCGACA    |
| CBS-R    | CGGAGGATCTCGATGGTGTG    |
| CD44-F   | CTGCCGCTTTCAGGTGTA      |
| CD44-R   | CATTGTGGGCAAGGTGCTATT   |
| CRYAB-F  | GGGGTCCTCACTGTGAATGG    |
| CRYAB-R  | TTCACGGGTGATGGGAATGG    |
| FANCD2-F | ACATACCTCGACTCATTGTGAGT |
| FANCD2-R | TCGGAGGCTTGAAAGGACATC   |
| GSS-F    | GGTGAGCTATGCCCCATTCA    |
| GSS-R    | CACCAGAGCACTGGGCAAT     |
| HMGCR-F  | TTCGGTGGCCTCTAGTGAGA    |
| HMGCR-R  | GATGGGAGGCCACAAAGAGG    |
| HSPB1-F  | GCTTCACGCGGAAATACACG    |
| HSPB1-R  | GTGATCTCGTTGGACTGCGT    |
| NCOA4-F  | GAGGTGTAGTGATGCACGGAG   |
| NCOA4-R  | GACGGCTTATGCAACTGTGAA   |
| NFE2L2-F | TCAGCGACGGAAAGAGTATGA   |

|          |                           |
|----------|---------------------------|
| NFE2L2-R | CCACTGGTTTCTGACTGGATGT    |
| NQO1-F   | GACCTTGTGATATTCCAGAGTAAGA |
| NQO1-R   | CCAGGCGTTTCTTCCATCCT      |
| RPL8-F   | TGTGATCCGTGGACAGAGGA      |
| RPL8-R   | GATCCCGGAAGACCACCTTG      |
| SLC1A5-F | CACGTCCCACCCAGAGAAAC      |
| SLC1A5-R | TGTCCGAAAGCTGGGAGTTC      |
| SQLE-F   | GTGCTGGTGTTCCTCTCGCT      |
| SQLE-R   | ATTGGTTCCTTTTCTGCGCCT     |
| LOX-F    | GGATACGGCACTGGCTACTT      |
| LOX-R    | TCTGGGTGTTGGCATCAAGC      |
| GAPDH-F  | GCACCGTCAAGGCTGAGAAC      |
| GAPDH-R  | TGGTGAAGACGCCAGTGGA       |

**Supplementary Table 5. Functional enrichment analysis of differentially expressed ferroptosis regulators between normal and tumor tissues.**

| ID         | Description                                                   | P-value  | p.adjust | q-value  | geneID           | Count |
|------------|---------------------------------------------------------------|----------|----------|----------|------------------|-------|
| GO:0006979 | response to oxidative stress                                  | 5.5E-05  | 0.012817 | 0.004632 | CRYAB/NQO1/HSPB1 | 3     |
| GO:0045540 | regulation of cholesterol biosynthetic process                | 2.14E-06 | 0.000601 | 0.000344 | ACACA/HMGCR/SQLE | 3     |
| GO:0106118 | regulation of sterol biosynthetic process                     | 2.14E-06 | 0.000601 | 0.000344 | ACACA/HMGCR/SQLE | 3     |
| GO:0090181 | regulation of cholesterol metabolic process                   | 4.32E-06 | 0.000742 | 0.000424 | ACACA/HMGCR/SQLE | 3     |
| GO:0006695 | cholesterol biosynthetic process                              | 7.32E-06 | 0.000742 | 0.000424 | ACACA/HMGCR/SQLE | 3     |
| GO:1902653 | secondary alcohol biosynthetic process                        | 7.62E-06 | 0.000742 | 0.000424 | ACACA/HMGCR/SQLE | 3     |
| GO:0016126 | sterol biosynthetic process                                   | 9.24E-06 | 0.000742 | 0.000424 | ACACA/HMGCR/SQLE | 3     |
| GO:1902930 | regulation of alcohol biosynthetic process                    | 9.24E-06 | 0.000742 | 0.000424 | ACACA/HMGCR/SQLE | 3     |
| GO:0050810 | regulation of steroid biosynthetic process                    | 1.49E-05 | 0.001048 | 0.000599 | ACACA/HMGCR/SQLE | 3     |
| GO:0019218 | regulation of steroid metabolic process                       | 3.32E-05 | 0.001965 | 0.001123 | ACACA/HMGCR/SQLE | 3     |
| GO:0006750 | glutathione biosynthetic process                              | 3.5E-05  | 0.001965 | 0.001123 | GSS/NFE2L2       | 2     |
| GO:0019184 | nonribosomal peptide biosynthetic process                     | 4.39E-05 | 0.002245 | 0.001282 | GSS/NFE2L2       | 2     |
| GO:0008203 | cholesterol metabolic process                                 | 5.85E-05 | 0.002741 | 0.001566 | ACACA/HMGCR/SQLE | 3     |
| GO:1902652 | secondary alcohol metabolic process                           | 6.45E-05 | 0.00279  | 0.001594 | ACACA/HMGCR/SQLE | 3     |
| GO:0016125 | sterol metabolic process                                      | 7.91E-05 | 0.003176 | 0.001814 | ACACA/HMGCR/SQLE | 3     |
| GO:0046165 | alcohol biosynthetic process                                  | 9.26E-05 | 0.003468 | 0.001981 | ACACA/HMGCR/SQLE | 3     |
| GO:0044272 | sulfur compound biosynthetic process                          | 0.000122 | 0.004167 | 0.00238  | GSS/ACACA/NFE2L2 | 3     |
| GO:0006694 | steroid biosynthetic process                                  | 0.00013  | 0.004167 | 0.00238  | ACACA/HMGCR/SQLE | 3     |
| GO:0046890 | regulation of lipid biosynthetic process                      | 0.000133 | 0.004167 | 0.00238  | ACACA/HMGCR/SQLE | 3     |
| GO:0010664 | negative regulation of striated muscle cell apoptotic process | 0.000209 | 0.006193 | 0.003538 | HMGCR/NFE2L2     | 2     |
| GO:0042398 | cellular modified amino acid biosynthetic process             | 0.000312 | 0.008767 | 0.005008 | GSS/NFE2L2       | 2     |

|            |                                                      |          |          |          |                  |   |
|------------|------------------------------------------------------|----------|----------|----------|------------------|---|
| GO:1901617 | organic hydroxy compound biosynthetic process        | 0.000337 | 0.009007 | 0.005145 | ACACA/HMGCR/SQLE | 3 |
| GO:0006749 | glutathione metabolic process                        | 0.000392 | 0.009717 | 0.005551 | GSS/NFE2L2       | 2 |
| GO:0010665 | regulation of cardiac muscle cell apoptotic process  | 0.000406 | 0.009717 | 0.005551 | HMGCR/NFE2L2     | 2 |
| GO:0010656 | negative regulation of muscle cell apoptotic process | 0.000435 | 0.009717 | 0.005551 | HMGCR/NFE2L2     | 2 |
| GO:0010662 | regulation of striated muscle cell apoptotic process | 0.000435 | 0.009717 | 0.005551 | HMGCR/NFE2L2     | 2 |
| GO:0010659 | cardiac muscle cell apoptotic process                | 0.00045  | 0.009717 | 0.005551 | HMGCR/NFE2L2     | 2 |
| GO:0010658 | striated muscle cell apoptotic process               | 0.00048  | 0.009991 | 0.005707 | HMGCR/NFE2L2     | 2 |
| GO:0007568 | aging                                                | 0.000552 | 0.011088 | 0.006334 | GSS/HMGCR/NFE2L2 | 3 |
| GO:0051188 | cofactor biosynthetic process                        | 0.000578 | 0.011199 | 0.006398 | GSS/ACACA/NFE2L2 | 3 |
| GO:0008202 | steroid metabolic process                            | 0.000604 | 0.011317 | 0.006465 | ACACA/HMGCR/SQLE | 3 |
| GO:0006066 | alcohol metabolic process                            | 0.000797 | 0.014442 | 0.00825  | ACACA/HMGCR/SQLE | 3 |
| GO:0006790 | sulfur compound metabolic process                    | 0.000849 | 0.014902 | 0.008513 | GSS/ACACA/NFE2L2 | 3 |

**Supplementary Table 6. Enriched pathways in Fe cluster A.**

| NAME                                     | ES       | NES      | NOM <i>p</i> -val | FDR <i>q</i> -val |
|------------------------------------------|----------|----------|-------------------|-------------------|
| HALLMARK_MYOGENESIS                      | 0.634332 | 3.307229 | 0                 | 0                 |
| HALLMARK_OXIDATIVE_PHOSPHORYLATION       | 0.604331 | 3.160266 | 0                 | 0                 |
| HALLMARK_ADIPOGENESIS                    | 0.479207 | 2.496    | 0                 | 0                 |
| HALLMARK_INTERFERON_ALPHA_RESPONSE       | 0.503841 | 2.335555 | 0                 | 0                 |
| HALLMARK_FATTY_ACID_METABOLISM           | 0.446815 | 2.273059 | 0                 | 0                 |
| HALLMARK_REACTIVE_OXYGEN_SPECIES_PATHWAY | 0.560496 | 2.267417 | 0                 | 0                 |
| HALLMARK_BILE_ACID_METABOLISM            | 0.445523 | 2.114106 | 0                 | 1.14E-04          |
| HALLMARK_ESTROGEN_RESPONSE_LATE          | 0.389252 | 2.058489 | 0                 | 3.29E-04          |
| HALLMARK_UV_RESPONSE_UP                  | 0.398036 | 2.016938 | 0                 | 2.93E-04          |
| HALLMARK_HEME_METABOLISM                 | 0.357601 | 1.886102 | 0                 | 8.47E-04          |
| HALLMARK_INTERFERON_GAMMA_RESPONSE       | 0.355599 | 1.861583 | 0                 | 8.33E-04          |
| HALLMARK_KRAS_SIGNALING_DN               | 0.349546 | 1.806281 | 0                 | 0.00131           |
| HALLMARK_XENOBIOTIC_METABOLISM           | 0.335465 | 1.736298 | 0.0020408         | 0.002037          |
| HALLMARK_ESTROGEN_RESPONSE_EARLY         | 0.321899 | 1.661753 | 0                 | 0.003715          |
| HALLMARK_PEROXISOME                      | 0.35326  | 1.639113 | 0.001996          | 0.004375          |
| HALLMARK_APICAL_JUNCTION                 | 0.311443 | 1.632621 | 0                 | 0.00443           |
| HALLMARK_COAGULATION                     | 0.304079 | 1.484184 | 0.0105042         | 0.018053          |
| HALLMARK_CHOLESTEROL_HOMEOSTASIS         | 0.331957 | 1.471765 | 0.0347648         | 0.01924           |
| HALLMARK_P53_PATHWAY                     | 0.272602 | 1.404251 | 0.0217822         | 0.033998          |
| HALLMARK_SPERMATOGENESIS                 | 0.228275 | 1.128314 | 0.246124          | 0.227237          |

**Supplementary Table 7. Enriched pathways in Fe cluster B.**

| NAME                                       | ES       | NES      | NOM <i>p</i> -val | FDR <i>q</i> -val |
|--------------------------------------------|----------|----------|-------------------|-------------------|
| HALLMARK_MYC_TARGETS_V2                    | -0.71611 | -3.08285 | 0                 | 0                 |
| HALLMARK_TGF_BETA_SIGNALING                | -0.68269 | -2.83247 | 0                 | 0                 |
| HALLMARK_UNFOLDED_PROTEIN_RESPONSE         | -0.55997 | -2.68873 | 0                 | 0                 |
| HALLMARK_MYC_TARGETS_V1                    | -0.5152  | -2.67385 | 0                 | 0                 |
| HALLMARK_PROTEIN_SECRETION                 | -0.55427 | -2.59826 | 0                 | 0                 |
| HALLMARK_EPITHELIAL_MESENCHYMAL_TRANSITION | -0.48943 | -2.56332 | 0                 | 0                 |
| HALLMARK_G2M_CHECKPOINT                    | -0.4862  | -2.55363 | 0                 | 0                 |
| HALLMARK_UV_RESPONSE_DN                    | -0.45711 | -2.2864  | 0                 | 0                 |
| HALLMARK_KRAS_SIGNALING_UP                 | -0.42344 | -2.21573 | 0                 | 0                 |
| HALLMARK_NOTCH_SIGNALING                   | -0.59168 | -2.17589 | 0                 | 0                 |
| HALLMARK_MITOTIC_SPINDLE                   | -0.4068  | -2.15244 | 0                 | 0                 |
| HALLMARK_WNT_BETA_CATENIN_SIGNALING        | -0.54391 | -2.14052 | 0                 | 0                 |
| HALLMARK_MTORC1_SIGNALING                  | -0.4043  | -2.11334 | 0                 | 0                 |
| HALLMARK_ANGIOGENESIS                      | -0.55215 | -2.08895 | 0                 | 0                 |
| HALLMARK_E2F_TARGETS                       | -0.39287 | -2.08114 | 0                 | 0                 |
| HALLMARK_GLYCOLYSIS                        | -0.38931 | -2.03895 | 0                 | 0                 |
| HALLMARK_INFLAMMATORY_RESPONSE             | -0.37657 | -1.96033 | 0                 | 0.00E+00          |
| HALLMARK_TNFA_SIGNALING_VIA_NFKB           | -0.34199 | -1.82698 | 0                 | 2.39E-04          |
| HALLMARK_ALLOGRAFT_REJECTION               | -0.33756 | -1.7869  | 0.0020534         | 0.000825          |
| HALLMARK_HEDGEHOG_SIGNALING                | -0.47323 | -1.76656 | 0.0094162         | 0.001076          |
| HALLMARK_ANDROGEN_RESPONSE                 | -0.36871 | -1.71922 | 0.0020747         | 0.001525          |
| HALLMARK_COMPLEMENT                        | -0.3241  | -1.7179  | 0                 | 0.001456          |
| HALLMARK_IL2_STAT5_SIGNALING               | -0.32191 | -1.70063 | 0                 | 0.001571          |
| HALLMARK_HYPOXIA                           | -0.30643 | -1.62027 | 0.0019342         | 0.00444           |
| HALLMARK_APOPTOSIS                         | -0.29261 | -1.49237 | 0.001992          | 0.013702          |
| HALLMARK_APICAL_SURFACE                    | -0.35631 | -1.40262 | 0.0677656         | 0.031103          |
| HALLMARK_DNA_REPAIR                        | -0.27639 | -1.39083 | 0.0291971         | 0.03286           |
| HALLMARK_IL6_JAK_STAT3_SIGNALING           | -0.29632 | -1.37348 | 0.0384615         | 0.037574          |

**Supplementary Table 9. Functional enrichment analysis of DEGs between two ferroptosis modification patterns.**

| ID         | Description                                 | <i>p</i> -value | <i>p</i> .adjust | <i>q</i> -value | geneID                                                                                             | Count |
|------------|---------------------------------------------|-----------------|------------------|-----------------|----------------------------------------------------------------------------------------------------|-------|
| GO:0005201 | extracellular matrix structural constituent | 8.44286E-12     | 3.05E-09         | 2.81E-09        | POSTN/COL1A1/COL5A1/COL12A1/SBSPON/DCN/FBLN2/NPNT/HMCN2/MXRA5/SRPX2/LUM/MFAP2/PCOLCE/PRELP         | 15    |
| GO:0008307 | structural constituent of muscle            | 4.38733E-09     | 7.92E-07         | 7.3E-07         | MYL9/CSRP1/SYNM/PDLIM3/MYH11/TPM1/TPM2/MYOM1                                                       | 8     |
| GO:0003779 | actin binding                               | 1.51403E-07     | 1.82E-05         | 1.68E-05        | CAP2/SORBS1/ADD3/CNN1/SYNPO2/FLNA/LMOD1/PDLIM3/MYH11/MYLK/MICAL1/FSCN1/TAGLN/TMOD1/TPM1/TPM2/MYOM1 | 17    |
| GO:0051015 | actin filament binding                      | 7.37154E-06     | 0.000602         | 0.000555        | ADD3/FLNA/MYH11/MICAL1/FSCN1/TAGLN/TMOD1/TPM1/TPM2/MYOM1                                           | 10    |

|            |                                                                                   |             |          |          |                     |   |
|------------|-----------------------------------------------------------------------------------|-------------|----------|----------|---------------------|---|
| GO:0016641 | oxidoreductase activity, acting on the CH-NH2 group of donors, oxygen as acceptor | 8.33687E-06 | 0.000602 | 0.000555 | LOX/MAOA/MAOB/AOC3  | 4 |
| GO:0016638 | oxidoreductase activity, acting on the CH-NH2 group of donors                     | 2.1615E-05  | 0.001301 | 0.001198 | LOX/MAOA/MAOB/AOC3  | 4 |
| GO:0048407 | platelet-derived growth factor binding                                            | 9.36937E-05 | 0.004832 | 0.004452 | COL1A1/COL5A1/PDGFR | 3 |

**Supplementary Table 10. Cmap analysis for DEGs.**

| Cmap name                         | Mean   | <i>n</i> | Enrichment | <i>p</i> | Specificity | Percent non-null |
|-----------------------------------|--------|----------|------------|----------|-------------|------------------|
| Doxylamine                        | -0.655 | 5        | -0.888     | 0.00006  | 0           | 100              |
| Sulfadimethoxine                  | -0.399 | 5        | -0.851     | 0.00022  | 0           | 60               |
| Carteolol                         | -0.266 | 4        | -0.837     | 0.00123  | 0           | 50               |
| 3-acetamidocoumarin               | -0.352 | 4        | -0.837     | 0.00125  | 0.026       | 50               |
| PHA-00851261E                     | 0.421  | 8        | 0.627      | 0.00154  | 0           | 75               |
| Sulfaquinoxaline                  | -0.646 | 3        | -0.899     | 0.00192  | 0.0062      | 100              |
| AH-6809                           | -0.707 | 2        | -0.961     | 0.0033   | 0.0056      | 100              |
| Harmine                           | 0.31   | 4        | 0.796      | 0.00342  | 0.0076      | 50               |
| Karakoline                        | -0.371 | 6        | -0.653     | 0.00475  | 0           | 50               |
| Difenidol                         | 0.455  | 3        | 0.863      | 0.00481  | 0.0152      | 66               |
| Sulfadiazine                      | -0.528 | 5        | -0.684     | 0.00717  | 0.0263      | 80               |
| Isoniazid                         | -0.388 | 5        | -0.672     | 0.00885  | 0.0497      | 60               |
| Cefotiam                          | -0.282 | 4        | -0.741     | 0.00891  | 0.0065      | 50               |
| Hydrocortisone                    | 0.382  | 3        | 0.834      | 0.00915  | 0           | 66               |
| Etiocholanolone                   | -0.402 | 6        | -0.612     | 0.01124  | 0.1948      | 66               |
| Mafenide                          | -0.291 | 5        | -0.654     | 0.0122   | 0.018       | 60               |
| STOCK1N-35874                     | 0.649  | 2        | 0.92       | 0.01272  | 0.0435      | 100              |
| Proscillaridin                    | 0.491  | 3        | 0.813      | 0.01302  | 0.0842      | 66               |
| Withaferin A                      | 0.624  | 4        | 0.71       | 0.01452  | 0.1947      | 75               |
| 16-phenyltetranorprostaglandin E2 | -0.535 | 4        | -0.708     | 0.0151   | 0.0298      | 75               |
| Sitosterol                        | 0.261  | 4        | 0.7        | 0.01667  | 0.0172      | 50               |
| PF-00539745-00                    | -0.384 | 3        | -0.798     | 0.01703  | 0.0815      | 66               |
| Puromycin                         | 0.474  | 4        | 0.695      | 0.01818  | 0.2472      | 75               |
| Ticarcillin                       | 0.366  | 3        | 0.789      | 0.01889  | 0.0133      | 66               |
| Flunarizine                       | 0.35   | 4        | 0.691      | 0.01898  | 0.034       | 50               |
| Gliquidone                        | 0.519  | 4        | 0.69       | 0.01932  | 0           | 75               |
| Cyproterone                       | 0.328  | 4        | 0.677      | 0.02367  | 0.024       | 50               |
| Alverine                          | -0.354 | 4        | -0.672     | 0.02586  | 0           | 75               |
| Clenbuterol                       | -0.407 | 5        | -0.598     | 0.03004  | 0.0397      | 60               |
| Oxybenzone                        | -0.369 | 4        | -0.657     | 0.03191  | 0.0986      | 50               |
| Practolol                         | 0.258  | 4        | 0.649      | 0.03599  | 0.0259      | 50               |
| Abamectin                         | -0.493 | 4        | -0.646     | 0.0375   | 0.0617      | 75               |

|                |        |   |        |         |        |    |
|----------------|--------|---|--------|---------|--------|----|
| Diazoxide      | -0.356 | 5 | -0.574 | 0.04189 | 0.061  | 60 |
| PHA-00767505E  | 0.433  | 4 | 0.636  | 0.04307 | 0.0387 | 75 |
| Harmalol       | -0.479 | 3 | -0.724 | 0.04333 | 0.052  | 66 |
| Sparteine      | 0.481  | 4 | 0.635  | 0.04345 | 0.0072 | 75 |
| Econazole      | 0.242  | 4 | 0.632  | 0.04552 | 0.1949 | 75 |
| Nialamide      | 0.429  | 4 | 0.63   | 0.04677 | 0.036  | 75 |
| 5255229        | 0.34   | 2 | 0.847  | 0.0472  | 0.0474 | 50 |
| Indoprofen     | -0.314 | 4 | -0.626 | 0.04852 | 0.1333 | 50 |
| Colecalciferol | -0.409 | 4 | -0.625 | 0.04886 | 0.0272 | 75 |
| Cinnarizine    | 0.549  | 4 | 0.625  | 0.04933 | 0.0584 | 75 |

**Supplementary Table 11. Full list of 43 prognostic DEGs.**

|          | <b>cox_HR</b> |
|----------|---------------|
| LIMS2    | 0.382144      |
| AOC3     | 0.481967      |
| SOD3     | 0.495754      |
| C11orf96 | 0.543024      |
| HMCN2    | 0.543768      |
| A2M      | 0.546305      |
| GADD45G  | 0.554395      |
| HSPB8    | 0.573024      |
| CLU      | 0.573242      |
| MYOC     | 0.582298      |
| RASL11A  | 0.582661      |
| CSRP1    | 0.59421       |
| MRVI1    | 0.618517      |
| PARM1    | 0.622781      |
| RASSF3   | 0.629226      |
| SLC24A3  | 0.634694      |
| PPP1R12B | 0.634896      |
| CHRD12   | 0.641911      |
| HSPB2    | 0.642656      |
| RBPM5    | 0.645255      |
| RASL12   | 0.649648      |
| SGCA     | 0.649931      |
| MICAL1   | 0.652491      |
| LMOD1    | 0.65268       |
| HMG2P19  | 0.65459       |
| MYL9     | 0.663697      |
| HSPB1    | 0.663706      |
| ALDH1B1  | 0.666453      |
| PRELP    | 0.667319      |
| DLK1     | 1.499914      |
| POSTN    | 1.530762      |
| COL5A1   | 1.53084       |
| SRPX2    | 1.543947      |



|         |          |
|---------|----------|
| FSCN1   | 1.587907 |
| CREB3L1 | 1.594449 |
| CCDC8   | 1.631176 |
| GOLM1   | 1.63245  |
| CPXM1   | 1.658367 |
| MDFI    | 1.665139 |
| PYCR1   | 1.732861 |
| LOX     | 1.819126 |
| MFAP2   | 1.903821 |
| LRRC17  | 2.177627 |

---
