# Supplementary material for: Molecular characterization of ferroptosis in soft tissue sarcoma constructs a prognostic and immunotherapeutic signature through experimental and bioinformatics analyses
Source: Aging (Albany NY). 2023 Oct 20;15(20):11412–47. doi: 10.18632/aging.205133 (PMC10637810; doi:10.18632/aging.205133)
Supplement: Supplementary Table 8 [file aging-15-205133-s003.xlsx]

## Sheet: Supplementary Table 8
Supplementary Table 8. The full list of DEGs between Fe cluster A and B.
	logFC	AveExpr	t	P.Value	adj.P.Val	B
CRYAB	2.40768	2.71864	21.5718	3.46697e-60	2.02419e-55	126.343
ASB2	2.0902	0.923679	14.5444	1.35109e-35	3.94416e-31	70.1895
KCNMB1	2.1103	0.928102	14.2945	1.02358e-34	1.99205e-30	68.1808
C15orf52	1.26925	0.583043	14.2555	1.40404e-34	2.04937e-30	67.8673
JPH2	2.26032	1.217	14.0773	5.92995e-34	6.88053e-30	66.4383
MYH11	3.58865	2.0156	14.0555	7.07085e-34	6.88053e-30	66.2637
CSRP1	1.90008	3.27346	13.995	1.15282e-33	9.61531e-30	65.7789
MYL9	2.09387	5.05786	13.869	3.18556e-33	2.32486e-29	64.7708
LMOD1	2.79918	2.12861	13.475	7.5809e-32	4.9179e-28	61.6273
HSPB2	1.03303	0.865334	13.1798	8.07076e-31	4.71212e-27	59.2819
SYNPO2	2.16394	1.65381	13.0523	2.23369e-30	1.18558e-26	58.2725
PPP1R12B	2.07434	1.48979	12.8189	1.43256e-29	6.79837e-26	56.43
RAMP1	2.28547	1.77393	12.8119	1.51372e-29	6.79837e-26	56.3754
TTYH3	-1.02337	2.89384	-12.6651	4.85303e-29	1.88896e-25	55.2204
FSCN1	-1.32699	3.52678	-12.6394	5.95169e-29	2.17181e-25	55.0181
FBXL22	1.44905	0.51653	12.5184	1.55028e-28	5.32429e-25	54.0691
CHRDL2	2.36599	1.14225	12.4524	2.61081e-28	8.02273e-25	53.5525
HSPB1	1.02066	5.30568	12.4384	2.91543e-28	8.51086e-25	53.4431
PLIN4	1.65349	0.703872	12.4314	3.08194e-28	8.56852e-25	53.388
MYLK	2.38408	2.02422	12.3992	3.97249e-28	1.05425e-24	53.1365
RBM38	1.14268	2.20864	12.3509	5.81451e-28	1.4145e-24	52.7589
CTC-296K1.4	1.82101	0.535871	12.3215	7.32401e-28	1.64466e-24	52.5301
MBNL1-AS1	1.39836	0.600743	12.3108	7.97142e-28	1.72374e-24	52.4462
MAOB	2.06223	1.3419	12.1593	2.62207e-27	5.27895e-24	51.2661
FBXO32	1.68335	2.20457	12.0229	7.62957e-27	1.43694e-23	50.2077
MRVI1	1.68614	1.26507	11.9901	9.85923e-27	1.79885e-23	49.9537
AP000892.6	1.33304	0.50794	11.9193	1.71341e-26	3.03144e-23	49.4061
CKMT2	1.35457	0.446006	11.9042	1.9282e-26	3.31112e-23	49.2891
ACTA2-AS1	1.22971	0.501873	11.8973	2.03433e-26	3.39355e-23	49.236
PDGFRA	-1.53138	1.59326	-11.8602	2.71686e-26	4.40623e-23	48.9493
SORBS1	1.76134	1.18549	11.8105	4.00003e-26	6.31194e-23	48.5661
TAGLN	2.45823	4.08562	11.7953	4.50114e-26	6.81154e-23	48.4492
PPP1R14A	1.80037	1.7674	11.7903	4.6796e-26	6.83046e-23	48.4106
ACTA2	2.07674	4.65389	11.7775	5.16884e-26	7.1853e-23	48.3121
TSPAN2	1.49989	0.952249	11.744	6.71028e-26	9.11116e-23	48.0536
POPDC2	1.49538	1.30983	11.7232	7.88522e-26	1.02306e-22	47.8937
MYOCD	1.79703	0.534429	11.7057	9.03082e-26	1.14623e-22	47.7593
PLN	2.30207	1.43717	11.6943	9.86394e-26	1.20961e-22	47.6719
HSPB7	1.74664	1.28762	11.6933	9.94456e-26	1.20961e-22	47.6639
RBPMS	1.33329	1.93921	11.6883	1.03374e-25	1.23173e-22	47.6255
CNN1	2.82738	2.78369	11.6748	1.14796e-25	1.34047e-22	47.5217
C11orf96	1.56582	2.55648	11.5293	3.5385e-25	3.62448e-22	46.4066
TMOD1	1.52821	0.911716	11.5207	3.78116e-25	3.80626e-22	46.3409
ITGB1BP2	1.07574	0.211927	11.4902	4.78481e-25	4.73494e-22	46.1077
PGM5	1.78647	1.34225	11.4539	6.33258e-25	6.16212e-22	45.8301
RAB9B	1.20326	0.696914	11.4075	9.04962e-25	8.52197e-22	45.4765
SLC25A4	1.0463	1.3052	11.4047	9.24788e-25	8.57043e-22	45.4551
LIMS2	1.21815	1.51831	11.2969	2.11758e-24	1.87326e-21	44.6346
HSPB8	1.77145	2.56925	11.2939	2.16648e-24	1.88791e-21	44.612
SBSPON	1.8193	1.07458	11.2197	3.82747e-24	3.19238e-21	44.0485
IL17B	1.58648	0.615401	11.1919	4.73601e-24	3.84044e-21	43.8376
FJX1	-1.00239	1.29154	-11.137	7.2027e-24	5.68283e-21	43.4224
RASL12	1.87187	1.98347	11.1085	8.95193e-24	6.96878e-21	43.2072
MICAL1	1.09146	2.10885	11.023	1.71733e-23	1.28547e-20	42.5622
ACTG2	2.96214	2.91417	10.9792	2.39575e-23	1.74845e-20	42.2326
TPM2	1.97259	4.20102	10.9516	2.9539e-23	2.12918e-20	42.0253
ALDH1B1	1.53027	2.85004	10.9168	3.8478e-23	2.73968e-20	41.7635
MIR143	1.16774	0.205401	10.8016	9.19634e-23	6.0329e-20	40.9011
COL5A1	-1.44033	3.99454	-10.7976	9.48502e-23	6.05629e-20	40.8705
SPEG	1.30244	0.905823	10.7969	9.53128e-23	6.05629e-20	40.8657
ADD3	-1.02381	1.83472	-10.7408	1.45574e-22	8.94668e-20	40.4465
HSPB3	1.72425	0.782313	10.716	1.75391e-22	1.05569e-19	40.2621
ITGA7	1.50773	2.12726	10.7088	1.85236e-22	1.10357e-19	40.2081
PDLIM3	1.63508	1.54205	10.5875	4.60619e-22	2.51339e-19	39.3067
PYCR1	-1.35936	2.14231	-10.5728	5.1454e-22	2.78161e-19	39.1971
A2M	1.20369	4.81726	10.5649	5.45721e-22	2.89878e-19	39.1389
CASQ2	1.96324	0.889152	10.5648	5.46143e-22	2.89878e-19	39.1381
RASL11A	1.209	1.28758	10.4968	9.08201e-22	4.55995e-19	38.6349
AC053503.6	1.26445	0.345188	10.4281	1.51682e-21	7.31898e-19	38.1275
LYNX1	1.1063	1.00577	10.4152	1.66933e-21	7.98882e-19	38.0327
SGCA	1.66693	0.899385	10.4016	1.84709e-21	8.69696e-19	37.9326
MXRA5	-1.72095	2.42092	-10.3924	1.97806e-21	9.23913e-19	37.8649
SLC24A3	1.51768	1.14395	10.3776	2.20911e-21	1.02364e-18	37.7556
RASSF3	1.12663	2.25931	10.375	2.25131e-21	1.03498e-18	37.7369
RBM24	1.39216	0.713118	10.3652	2.42231e-21	1.09633e-18	37.6644
RASD2	1.29592	0.937751	10.264	5.13196e-21	2.15561e-18	36.9219
PRUNE2	1.50776	1.50844	10.1629	1.08256e-20	4.41996e-18	36.1837
SLMAP	1.08287	1.38444	10.1534	1.16096e-20	4.70715e-18	36.1145
HMGN2P19	1.15454	0.213753	10.1392	1.28916e-20	5.15531e-18	36.0109
TPD52L1	1.05581	0.727262	10.0633	2.25342e-20	8.71299e-18	35.4587
LINC00578	1.20786	0.426256	10.0481	2.51861e-20	9.61106e-18	35.3487
REEP1	1.12147	0.669844	10.0276	2.92738e-20	1.09561e-17	35.2
HSD17B6	1.30535	0.831515	10.0134	3.24991e-20	1.20092e-17	35.0967
CLMP	-1.15466	1.75153	-9.86795	9.39981e-20	3.11679e-17	34.0468
SYNM	1.61913	1.67001	9.84855	1.0825e-19	3.55067e-17	33.9072
FRMD6-AS2	1.10517	0.075616	9.84585	1.10397e-19	3.58084e-17	33.8878
ITPR1	1.07361	1.08966	9.82746	1.26194e-19	4.07061e-17	33.7556
GOLM1	-1.01898	2.79903	-9.80161	1.52258e-19	4.83128e-17	33.5701
DES	3.03348	3.0675	9.79779	1.56538e-19	4.94024e-17	33.5427
PGM5-AS1	1.36682	0.507121	9.77026	1.91134e-19	5.99965e-17	33.3453
KCNH2	1.4911	0.913953	9.73471	2.47256e-19	7.67966e-17	33.0909
PCP4	2.08458	0.823638	9.73469	2.47285e-19	7.67966e-17	33.0908
PAPSS2	-1.07784	1.58382	-9.72454	2.66125e-19	8.22102e-17	33.0182
LINC00890	1.96401	0.611463	9.65505	4.39562e-19	1.29615e-16	32.5224
SOD3	1.39719	2.88271	9.61508	5.86187e-19	1.66093e-16	32.238
ITGA8	1.57486	1.06083	9.58411	7.32412e-19	2.01763e-16	32.0179
CREB3L1	-1.34064	2.20263	-9.58407	7.32614e-19	2.01763e-16	32.0177
RPE65	1.17786	0.167379	9.51227	1.2261e-18	3.19579e-16	31.5089
CA3	1.39356	0.516329	9.40891	2.56505e-18	6.319e-16	30.7799
WFDC2	1.69347	0.974887	9.34687	3.98736e-18	9.46349e-16	30.3442
MEG3	-1.46707	1.25232	-9.3044	5.38906e-18	1.21953e-15	30.0467
FLNA	1.15217	5.04689	9.30359	5.42022e-18	1.22185e-15	30.041
TNFAIP8L3	1.30745	1.76467	9.29962	5.57484e-18	1.23759e-15	30.0133
CAP2	1.18888	1.03788	9.22829	9.23052e-18	1.96688e-15	29.5154
MEOX2	-1.34625	1.17655	-9.22038	9.76e-18	2.04243e-15	29.4603
TPM1	1.17682	3.17496	9.19093	1.20119e-17	2.46941e-15	29.2554
SH3BGR	1.16982	1.48514	9.13655	1.76066e-17	3.50841e-15	28.8779
MYOM1	1.04887	0.805272	9.06439	2.91938e-17	5.46308e-15	28.3788
AOC3	1.48887	2.07982	9.05538	3.10927e-17	5.78135e-15	28.3167
IGFBPL1	1.07102	0.32067	8.96637	5.78376e-17	1.0202e-14	27.7042
CYFIP2	1.04503	0.892652	8.95443	6.28446e-17	1.08878e-14	27.6223
MRC2	-1.13651	3.30978	-8.94771	6.5851e-17	1.13413e-14	27.5762
MMP2	-1.52416	4.53945	-8.80351	1.78599e-16	2.84419e-14	26.5919
FHL1	1.23786	3.12317	8.79511	1.89234e-16	3.00228e-14	26.5349
MAOA	1.08257	0.755039	8.76468	2.33307e-16	3.64215e-14	26.3284
PRELP	1.42373	1.57936	8.746	2.65261e-16	4.08635e-14	26.2018
PLAGL1	-1.00688	0.973359	-8.72697	3.02256e-16	4.60635e-14	26.0731
LMO1	1.08638	0.136709	8.70614	3.48652e-16	5.23291e-14	25.9322
CD248	-1.57136	3.83281	-8.68196	4.11389e-16	6.11169e-14	25.7691
MFAP2	-1.11413	2.8308	-8.68102	4.14066e-16	6.12032e-14	25.7627
CDH3	1.18821	0.685906	8.65731	4.86885e-16	7.05473e-14	25.603
EBF3	-1.06545	0.988493	-8.65729	4.8695e-16	7.05473e-14	25.6028
PCOLCE	-1.3004	3.99753	-8.64324	5.35999e-16	7.70795e-14	25.5082
MAMDC2	1.01345	1.16648	8.64162	5.41941e-16	7.77425e-14	25.4974
WBSCR17	1.26462	1.32299	8.61254	6.60746e-16	9.34083e-14	25.3019
FAM129A	1.08445	2.30917	8.51909	1.24637e-15	1.66902e-13	24.6764
SEMA7A	-1.08667	1.05682	-8.51061	1.32001e-15	1.75157e-13	24.6198
SIX2	-1.2538	1.35886	-8.48747	1.54353e-15	2.01609e-13	24.4657
HMCN2	1.05172	0.451469	8.44601	2.04186e-15	2.56926e-13	24.19
HAND2	1.26099	1.04298	8.43349	2.22153e-15	2.75966e-13	24.1069
DIRAS1	1.12039	0.939315	8.42762	2.31102e-15	2.85261e-13	24.068
ADAM12	-1.11533	1.59876	-8.24293	7.95074e-15	8.67671e-13	22.8509
HEPH	1.16151	1.23796	8.23216	8.54078e-15	9.26866e-13	22.7804
ACTC1	1.55594	0.74817	8.21523	9.55656e-15	1.03326e-12	22.6697
COL1A1	-1.4324	6.29443	-8.20406	1.02915e-14	1.10252e-12	22.5967
LOX	-1.0775	2.25316	-8.18701	1.15225e-14	1.22317e-12	22.4855
SRPX2	-1.16506	1.86598	-8.15111	1.46113e-14	1.52065e-12	22.2517
ADAMTS2	-1.12148	2.23629	-8.12546	1.73067e-14	1.76037e-12	22.085
IGF2	-2.0184	2.91411	-8.05455	2.75926e-14	2.66721e-12	21.6259
TCEAL2	1.41185	0.871148	8.05152	2.8146e-14	2.71173e-12	21.6063
DCN	-1.78518	3.26976	-8.02214	3.41225e-14	3.24999e-12	21.4168
COX7A1	1.03667	2.69194	7.94006	5.83013e-14	5.26108e-12	20.8898
SLC22A3	1.10876	0.957202	7.92008	6.63891e-14	5.91775e-12	20.762
GFPT2	-1.03197	2.14048	-7.82222	1.25095e-13	1.05621e-11	20.1389
PARM1	1.08467	1.64447	7.81942	1.2737e-13	1.07154e-11	20.1211
RRAD	1.00167	1.26615	7.76339	1.82669e-13	1.48539e-11	19.7666
ADCY5	1.00317	0.521532	7.71088	2.55741e-13	2.02323e-11	19.4358
CLU	1.33712	3.9595	7.70305	2.68855e-13	2.1241e-11	19.3866
RCN3	-1.18875	3.50241	-7.69912	2.757e-13	2.17523e-11	19.3619
MXRA8	-1.14393	3.51923	-7.52522	8.31098e-13	5.82517e-11	18.2777
NPNT	1.02921	1.16229	7.47858	1.11435e-12	7.51288e-11	17.9896
ACTA1	1.66479	0.8223	7.46197	1.23676e-12	8.24862e-11	17.8873
COL12A1	-1.04465	2.76253	-7.38096	2.05139e-12	1.30753e-10	17.3904
LRRC17	-1.13646	1.97618	-7.21737	5.63997e-12	3.33289e-10	16.398
CCDC8	-1.08111	1.26577	-7.19076	6.6397e-12	3.87659e-10	16.2379
GADD45G	1.04504	1.93512	7.16619	7.71669e-12	4.4515e-10	16.0905
CPXM1	-1.48477	2.71882	-7.03844	1.67694e-11	8.99893e-10	15.3295
PI15	1.02569	0.794393	7.02339	1.83633e-11	9.73791e-10	15.2405
SERPINF1	-1.15289	3.8546	-7.01826	1.89404e-11	1.00076e-09	15.2102
MDFI	-1.20043	1.10307	-7.01144	1.97355e-11	1.03807e-09	15.1699
PTGES	-1.25866	2.1028	-6.94553	2.93228e-11	1.48354e-09	14.7819
DLK1	-1.53267	0.629202	-6.9247	3.32135e-11	1.656e-09	14.6599
ANPEP	-1.18431	1.807	-6.90218	3.79934e-11	1.86564e-09	14.5282
PDPN	-1.22433	1.72703	-6.79448	7.19845e-11	3.26305e-09	13.9025
FBLN2	-1.27558	2.82748	-6.65564	1.62442e-10	6.81823e-09	13.1061
CES1	1.34245	1.0364	6.5198	3.56268e-10	1.38487e-08	12.3383
CRABP2	-1.13494	3.64515	-6.43021	5.94434e-10	2.19797e-08	11.8381
MYOC	1.19328	0.638642	6.32852	1.05655e-09	3.68718e-08	11.2765
LUM	-1.56184	3.77221	-6.2305	1.82829e-09	6.02395e-08	10.7415
TMEM119	-1.07922	1.91503	-6.1525	2.81643e-09	8.86454e-08	10.3201
TNFAIP6	-1.00261	1.52699	-6.03228	5.44085e-09	1.5963e-07	9.67852
HSPB6	1.02176	3.8227	5.60483	5.24236e-08	1.21928e-06	7.47604
CHRDL1	1.02781	2.05395	5.35787	1.83554e-07	3.698e-06	6.26157
POSTN	-1.19099	3.59157	-4.92284	1.50485e-06	2.42094e-05	4.23042
